# Supplementary material
Source: Preprints.org preprint supplement (doi:10.20944/preprints202103.0431.v3)
Supplement: Supplementary file 1 [file supplementary]

## SUPPLEMENTARY MATERIALS

### Supplementary Figure 1

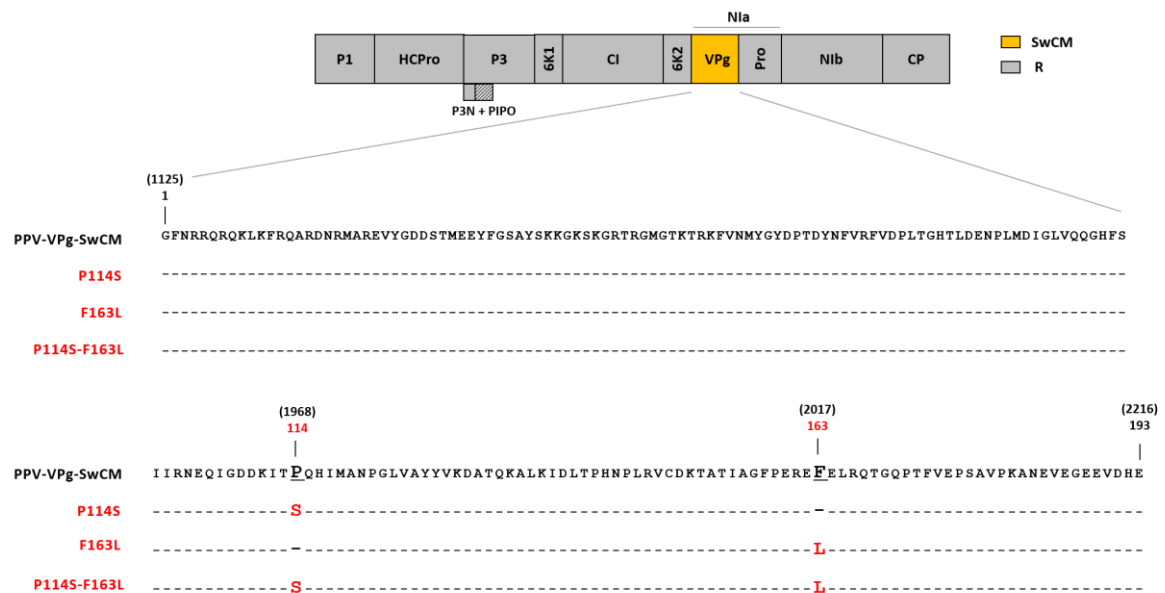

**Supplementary Fig. S1:** Sequence of VPg in the polyproteins of the chimeric construct pICPPV-VPgSwCM-R 44 and its mutated versions. Polyprotein regions derived from *Plum pox virus* (PPV) isolates R and SwCMp are shown in gray and orange, respectively. Underlined amino acids in the VPg protein of SwCMp were mutated to those depicted in red.

## Supplementary Figure 2

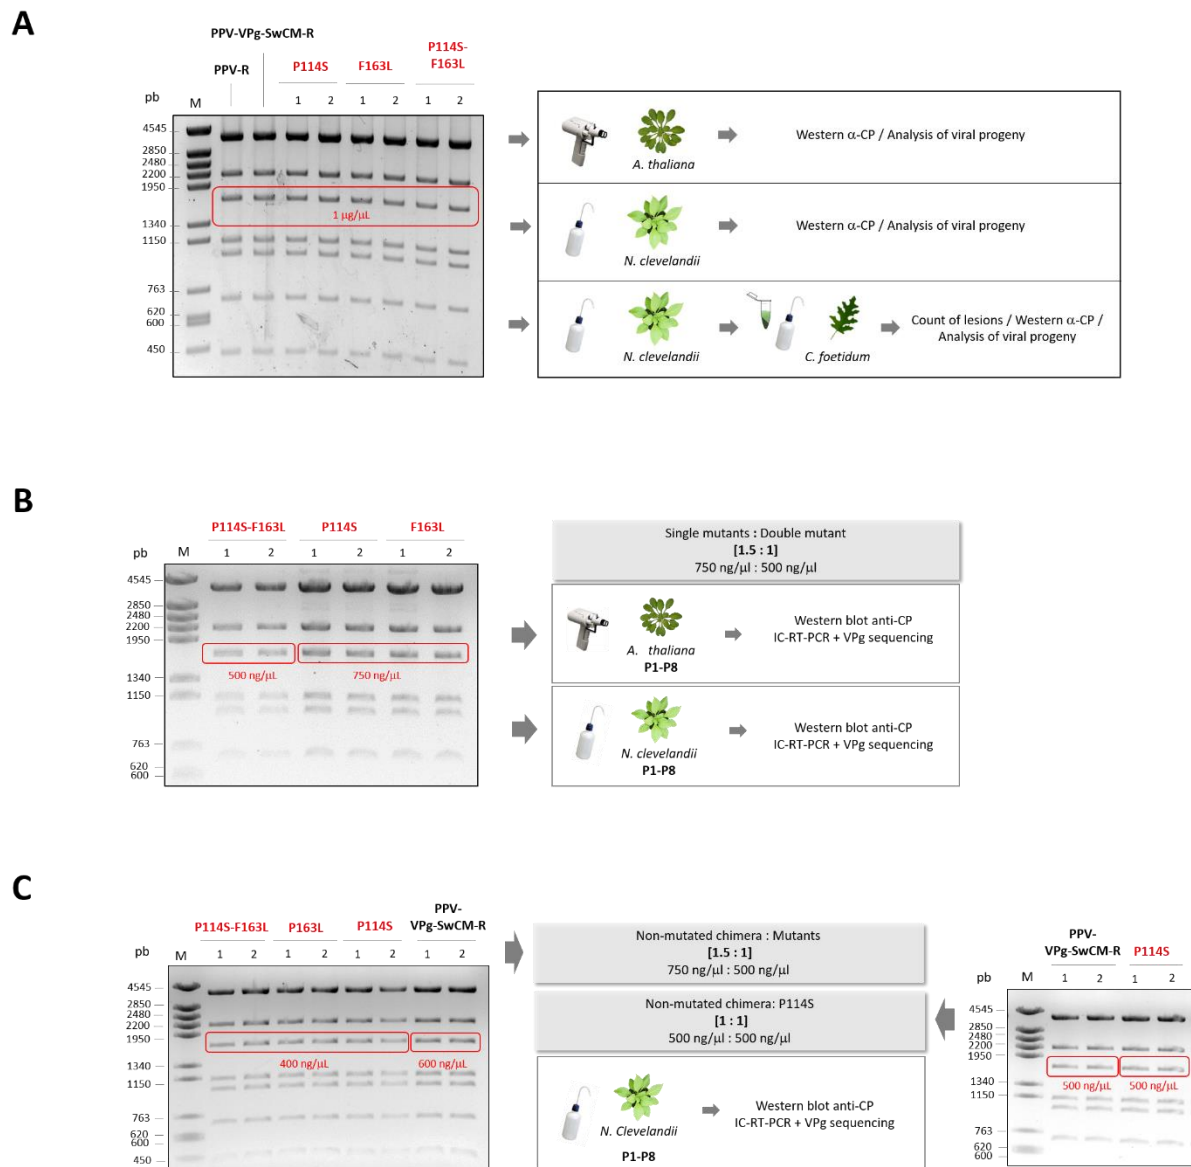

**Supplementary Fig. S2.** Schematic representation of the experimental approach followed to assess the effect of VPg mutations on *Plum pox virus* (PPV) infection in different hosts. Full-length PPV cDNA clones were mechanically inoculated into *Arabidopsis thaliana* plants by biolistic (represented by a Gene Gun device), or into *Nicotiana clevelandii* and *Chenopodium foetidum* plants by hand-rubbing (represented by a Carborundum bottle). Amounts of DNAs used as inocula were adjusted to deliver each virus at specified doses, as shows the enzymatic pattern rendered after *EcoRI* digestion of each construct. Fragments yielded by the *HindIII*-digested phi29 fago DNA used as molecular-weight size marker (M) are also indicated.

### Supplementary Figure 3

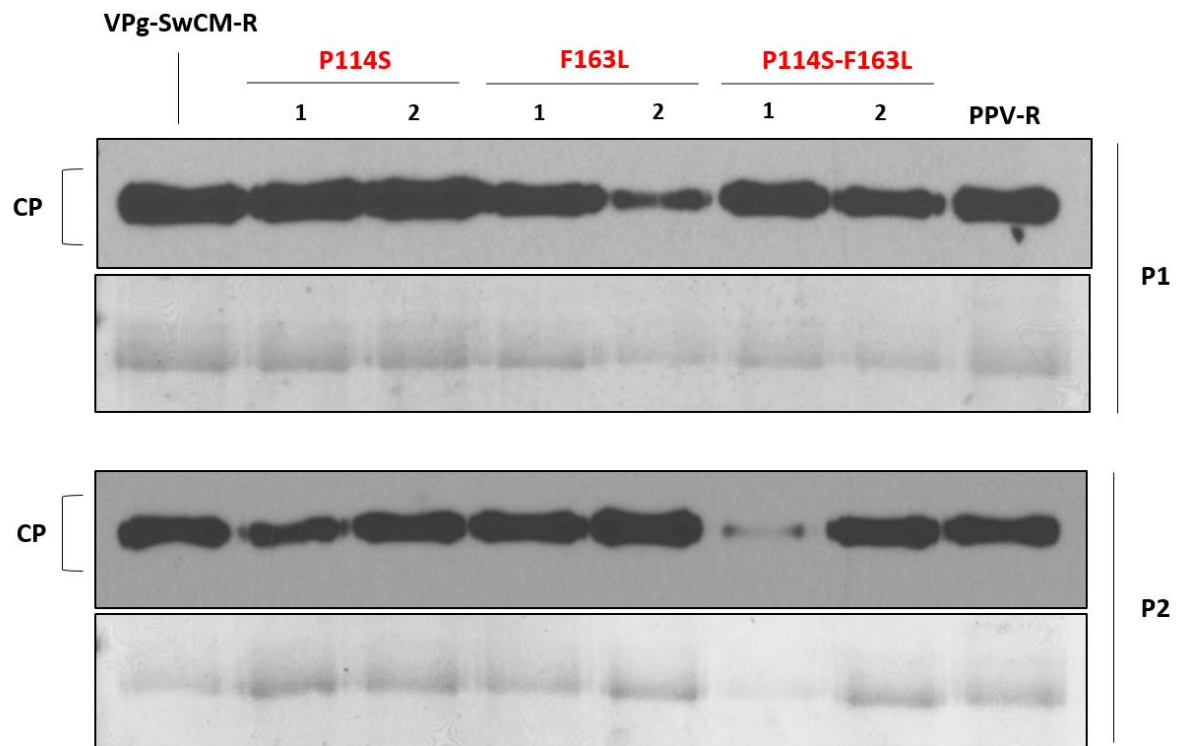

**Supplementary Fig. S3:** Effect of VPg mutations on *Plum pox virus* (PPV) infection of *Nicotiana clevelandii*. *N. clevelandii* plants were inoculated by hand-rubbing with DNAs of the chimeric clone pICPPV-VPgSwCM-R, the indicated chimera-derived mutants (two independent clones, 1 and 2), or the PPV-R clone pICPPV-NK-IGFP. Extracts from upper non-inoculated leaves collected at 15 days after inoculation were subjected to CP-specific immunoblot analysis. Two individual plants (P1 and P2) inoculated with the specified viruses, were analysed. Blots stained with Ponceau red showing the large subunit of the ribulose-1,5-bisphosphate carboxylase/oxygenase (RuBisCO) are included as loading controls.

## Supplementary Figure 4

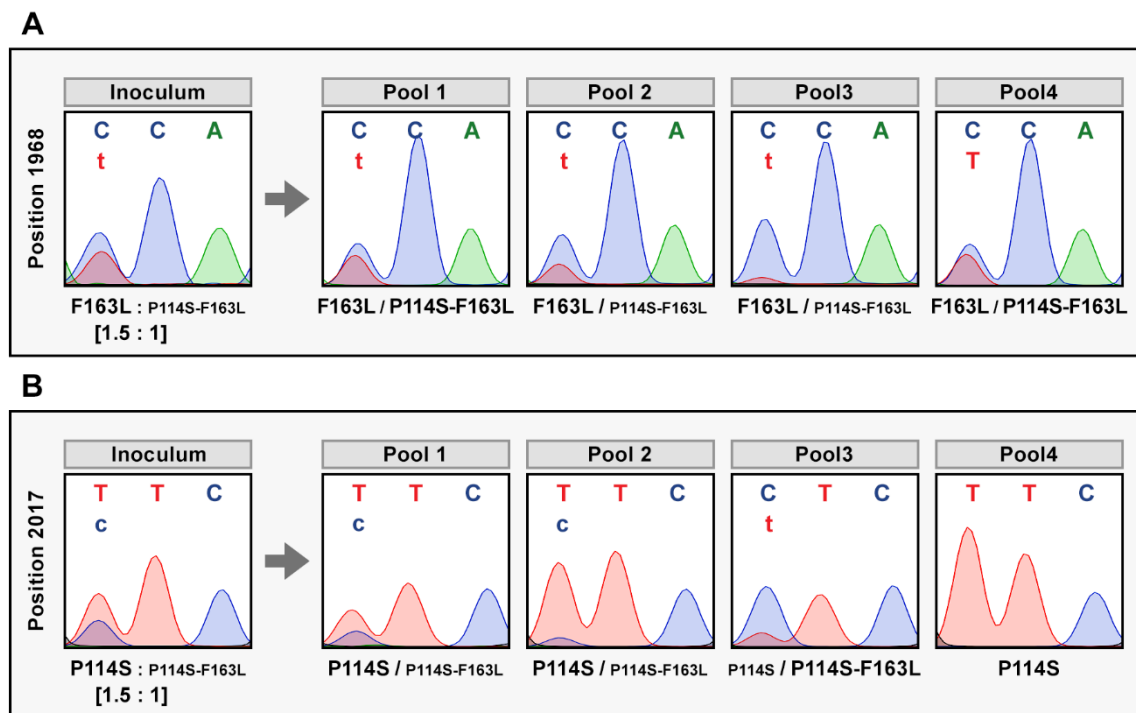

**Supplementary Fig. S4:** Sequence analysis of viral progeny from *Nicotiana clevelandii* exposed to mixed infections with competing viruses. Eight *N. clevelandii* plants were inoculated by hand-rubbing with DNA mixtures containing the indicated pICPPV-VPgSwCM-R-derived mutant clones. In the two competitions, the single mutant was overrepresented in the inoculum with respect to the double mutant (ratio 1.5:1). Viral progeny were analyzed in pools of two plants by reverse transcription-polymerase chain reaction (RT-PCR) and sequencing of a cDNA fragment covering the VPg coding sequence. Images show the chromatograms of VPg codons 114 (position 1968-70 in the viral genome) (**A**) or 163 (position 2017-19 in the viral genome) (**B**). Viruses identified are indicated beneath the chromatograms; smaller letters indicate lower accumulation.

## Supplementary Figure 5

**A**

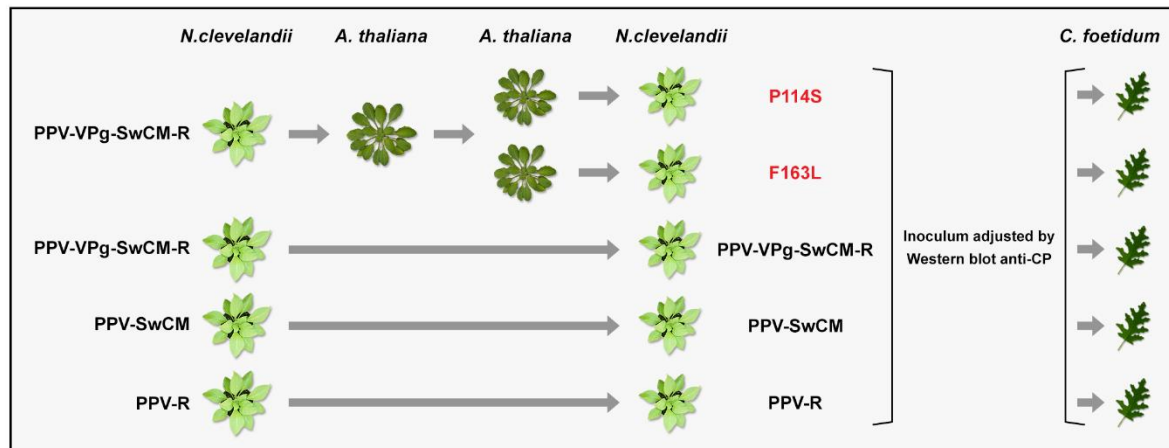

**B**

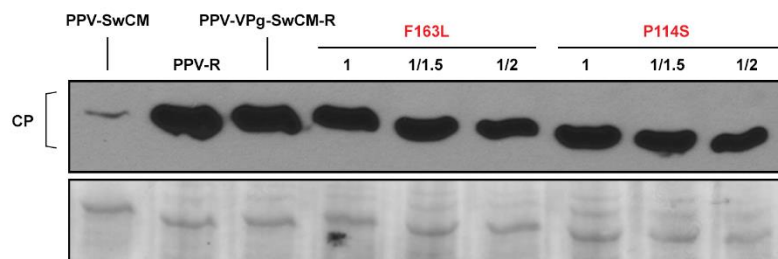

**C**

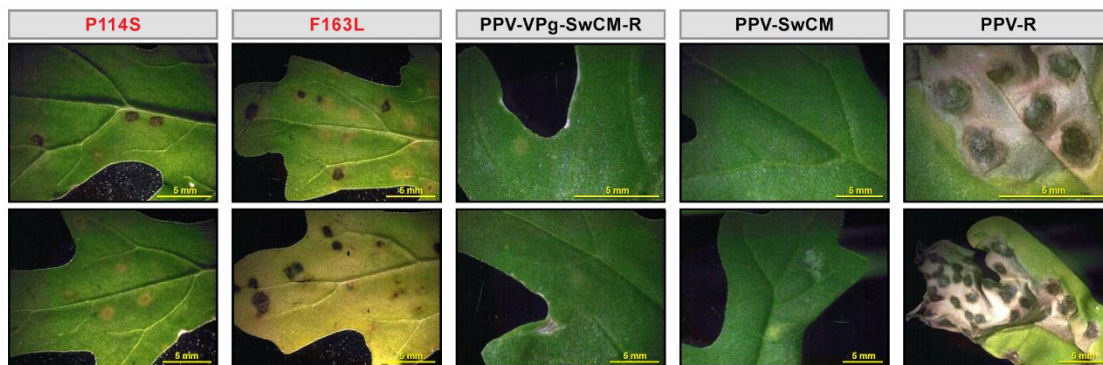

**Supplementary Figure S5:** Effect of VPg mutations on *Nicotiana clelandii* infection by Plum pox virus (PPV). (A) Schematic representation of the experimental approach. (B) Prior to *C. foetidum* inoculation, extracts from upper non-inoculated leaves of *N. clelandii* plants infected with the different viruses, collected at 10 days after inoculation, were subjected to coat protein (CP)-specific immunoblot analysis to estimate virus accumulation, thus allowing to adjust the inoculum doses. Increasing dilutions of the extracts from plants infected with the mutant viruses are indicated. The lower signal observed for the PPV-SwCMp sample is consequence of the significantly poorer recognition of PPV-SwCMp CP compared to PPV-R

CP by the choice antibody. Blots stained with *Ponceau* red showing the large subunit of the ribulose-1,5-bisphosphate carboxylase-oxygenase (RuBisCO) are included as loading controls in both cases. (C) Images of *C. foetidum* leaves taken under visible light at 15 days post infection, after being inoculated with extracts of infected *N. clevelandii* plants. Bar, 5 mm.

## Supplementary Figure 6

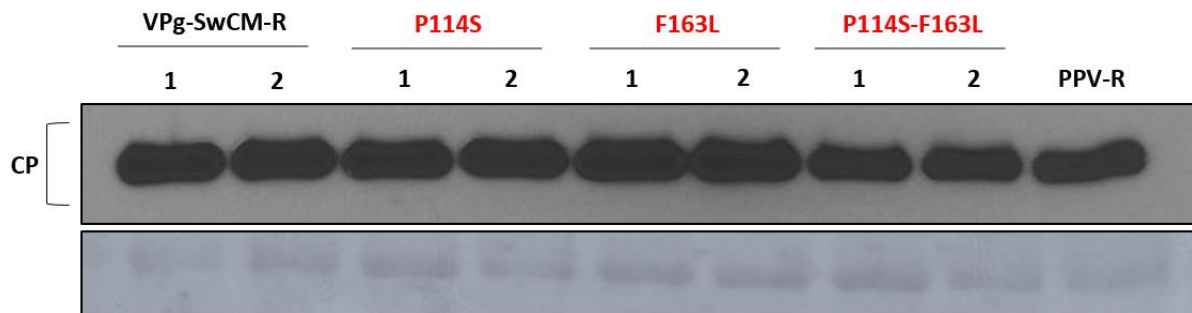

**Supplementary Fig. S6:** Assessment of viral titers in *Nicotiana clelandii* extracts employed to inoculate *Chenopodium foetidum* plants. *N. clelandii* plants were inoculated by hand-rubbing with with DNA of the chimeric clone pICPPV-VPgSwCM-R, the indicated chimera-derived mutants (two independent clones, 1 and 2), or the PPV-R clone pICPPV-NK-IGFP. Extracts were prepared from upper non-inoculated leaves collected at 7 days post inoculation and their virus titers were adjusted with extracts from healthy leaves on the basis of a previous quantitative anti-CP immunoblot assay. The adjusted extracts were inoculated by hand-rubbing in *C. foetidum* leaves. Equalization of viral titers in the inocula was verified in the CP-specific immunoblot shown in the figure. Blots stained with *Ponceau* red showing the large subunit of the ribulose-1,5-bisphosphate carboxylase-oxygenase (RuBisCO) are included as loading controls.

## Supplementary Figure 7

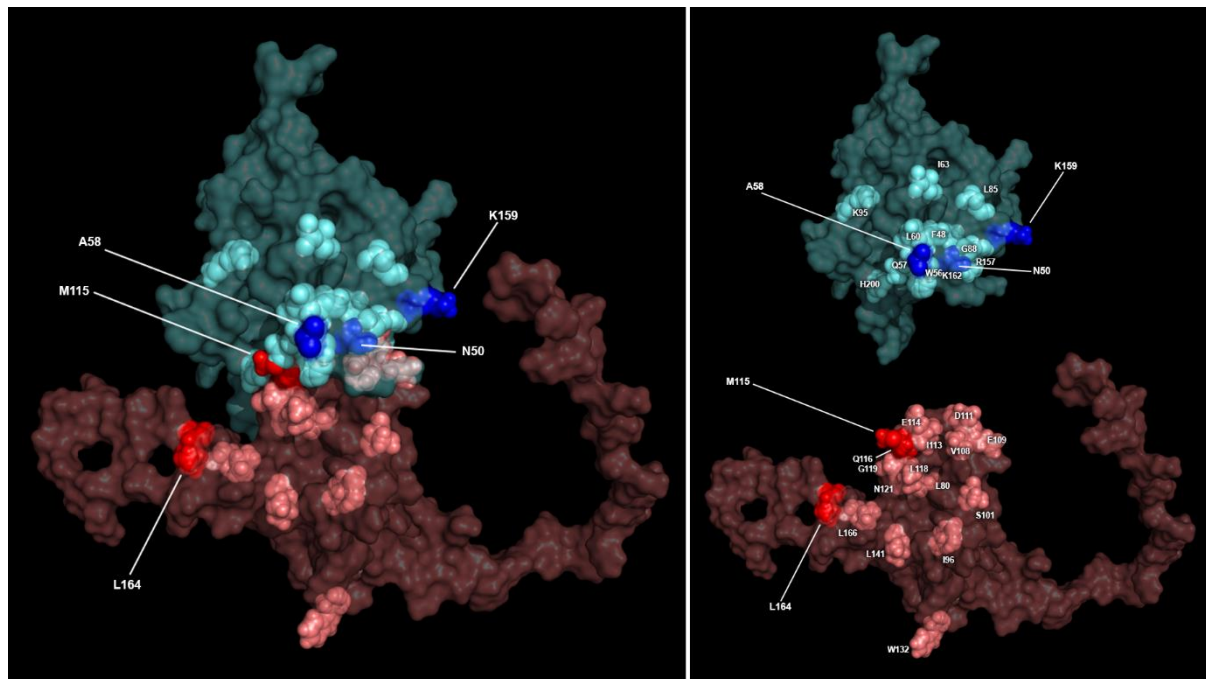

**Supplementary Figure S7:** HADDOCK-derived structure of the human eIF4E (h-eIF4E) in complex with the VPg of *Potato virus Y* (PVY) (PVY VPg), obtained by Countinho de Oliveira et al. [51], in which the following residues are highlighted: (i) PVY VPg residues perturbed by h-eIF4E binding (in salmon); (ii) residues in PVY VPg equivalent to those of *Plum pox virus* VPg mediating adaptation of the chimeric virus PPV-VPgSwCM-R to *Arabidopsis thaliana* and *Chenopodium foetidum*, P114 [that match one amino acid specified in (i)] and F163 (both in red); (iii) h-eIF4E residues perturbed by PVY VPg binding, whose equivalents are conserved among *A. thaliana*, *Nicotiana clevelandii* and *C. foetidum* (in cyan); and iv) residues in h-eIF4E perturbed by PVY VPg binding, whose equivalents in eIF(iso)4E from *A. thaliana*, *N. clevelandii* and *C. foetidum* are not fully conserved (in bright blue). Structural details were visualized using PyMOL. On the left, h-eIF4E:PVY VPg complex, pointing key residues addressed in this study. On the right, both molecules, separately disposed, indicating all residues reported to be perturbed after protein:protein interaction, according to Counthino de Oliveira et al. [51].



## Supplementary Table S1

**Supplementary Table S1.** Primer list

| Construct <sup>a</sup>                                                     | Primer name | Primer sequence                                            |
|----------------------------------------------------------------------------|-------------|------------------------------------------------------------|
| <i>Mutators for site directed mutagenesis <sup>b</sup></i>                 |             |                                                            |
| P114S                                                                      | LBR2-F      | 5'-GGAGATGACAAGATCACA <b><u>tCA</u></b> CAACACATAATGG-3'   |
|                                                                            | LBR1-R      | 5'-GCCATTATGTGTTG <b><u>TGa</u></b> TGTGATCTTGTTCATCTCC-3' |
| F163L                                                                      | LBR4-F      | 5'-GGTTTTCCGGAGAGAGAG <b><u>cTC</u></b> GAGTTGAGACAAAC-3'  |
|                                                                            | LBR3-R      | 5'-GTTTGTCTCAACTC <b><u>GAg</u></b> CTCTCTCTCCGGAAAACC-3'  |
| <i>Externals for site directed mutagenesis</i>                             |             |                                                            |
| P114S                                                                      | LBR5-ExF    | 5'-CTTAAGTTTCGCCAAGCTCGCGATAACCGGAT-3'                     |
| F163L<br>P114S-F163L                                                       | LBR6-ExR    | 5'-GAATACTGCCATCTCGAGTGCTCACGATGG-3'                       |
| <i>Viral progeny characterization via RT-PCR or IC-RT-PCR <sup>c</sup></i> |             |                                                            |
| pICPPV-VPgSwCM-R<br>P114S<br>F163L<br>P114S-F163L                          | 2295        | 5'-CAAAGAAGAAGTTGTTCCACCAAGGGTTCAATCGACGGCAGAGAC-3'        |
|                                                                            | 2277        | 5'-CCTCTGAACAGTGATTTACTTTCATGATCGACTTCCTCACC-3'            |
| pICPPV-NK-IGFP                                                             | SM16-F      | 5'-CTTGGTGGAGGGGCATG-3'                                    |
|                                                                            | SM17-R      | 5'-CTTGCGATTGGATTATAGTCTCTC-3'                             |
| <i>VPg sequencing</i>                                                      |             |                                                            |
| SM18-F                                                                     |             | 5'-GGAGGGGCATGGATG-3'                                      |
| SM19-R                                                                     |             | 5'-ATTGGATTATAGTCTCTCAGG-3'                                |
| <i>Cf-eIF(iso)4E gene fragment amplification <sup>d</sup></i>              |             |                                                            |
| SM110-F-deg                                                                |             | 5'-AAACAACCMCACAARYTAGAGAG-3'                              |
| SM111-R-deg                                                                |             | 5'-TCTTTCCACTTCCTWCCAATGCCCATC-3'                          |

<sup>a</sup> Constructs obtained and/or used for the different assays

<sup>b</sup> Mutated codons in bold and underlined. Specific changes are written in lower case

<sup>c</sup> RT-PCR / IC-RT-PCR, Reverse transcription and PCR / preceded by immune-capture

<sup>d</sup> Degenerate primers for Cf-eIF(iso)4E, isoform of the eukaryotic translation initiation factor 4E from *Chenopodium foetidum* identification

## Supplementary Table S2

**Supplementary Table S2.** Effect of specific mutations at the VPg of the *Plum pox virus*, isolate SwCMp (strain C), on the infection of *Chenopodium foetidum*

| Inoculum <sup>a</sup> | Total inoculated leaves | Number of lesions <sup>b</sup> |                              |
|-----------------------|-------------------------|--------------------------------|------------------------------|
|                       |                         | 9 dpi                          | 15 dpi                       |
| PPV-VPgSwCM-R         | 15                      | 2 <sup>(?)</sup>               | 5 + 2 <sup>(?)</sup>         |
| <b>P114S</b>          | 21                      | 137                            | 140                          |
| <b>F163L</b>          | 21                      | 353                            | 360                          |
| PPV-SwCMp             | 15                      | -                              | -                            |
| PPV-R                 | 9                       | > 60 / leaf<br>3 dead leaves   | > 60 / leaf<br>4 dead leaves |

<sup>a</sup> Inoculums consisted on leaf extracts of previously infected *Nicotiana clevelandii* plants (according to Supplementary Figure S5), containing the specified viruses. Three leaves per plant were mechanically inoculated by hand-rubbing, at 5 µL extract per leaf.

<sup>b</sup> Total number of lesions, chlorotic or necrotic, counted for the total number of inoculated leaves, or per leaf in the case of the positive control at 9 and 15 days post inoculation (dpi). (?), Doubtful lesions.
